# Supplementary material for: Quercetin prevents the USP22-Snail1 signaling pathway to ameliorate diabetic tubulointerstitial fibrosis
Source: Royal Society of Chemistry journal article supplement (doi:10.1039/d4fo03564j), 2024-01-01
Supplement: d4fo03564j1.pdf [file d4fo03564j1.pdf]

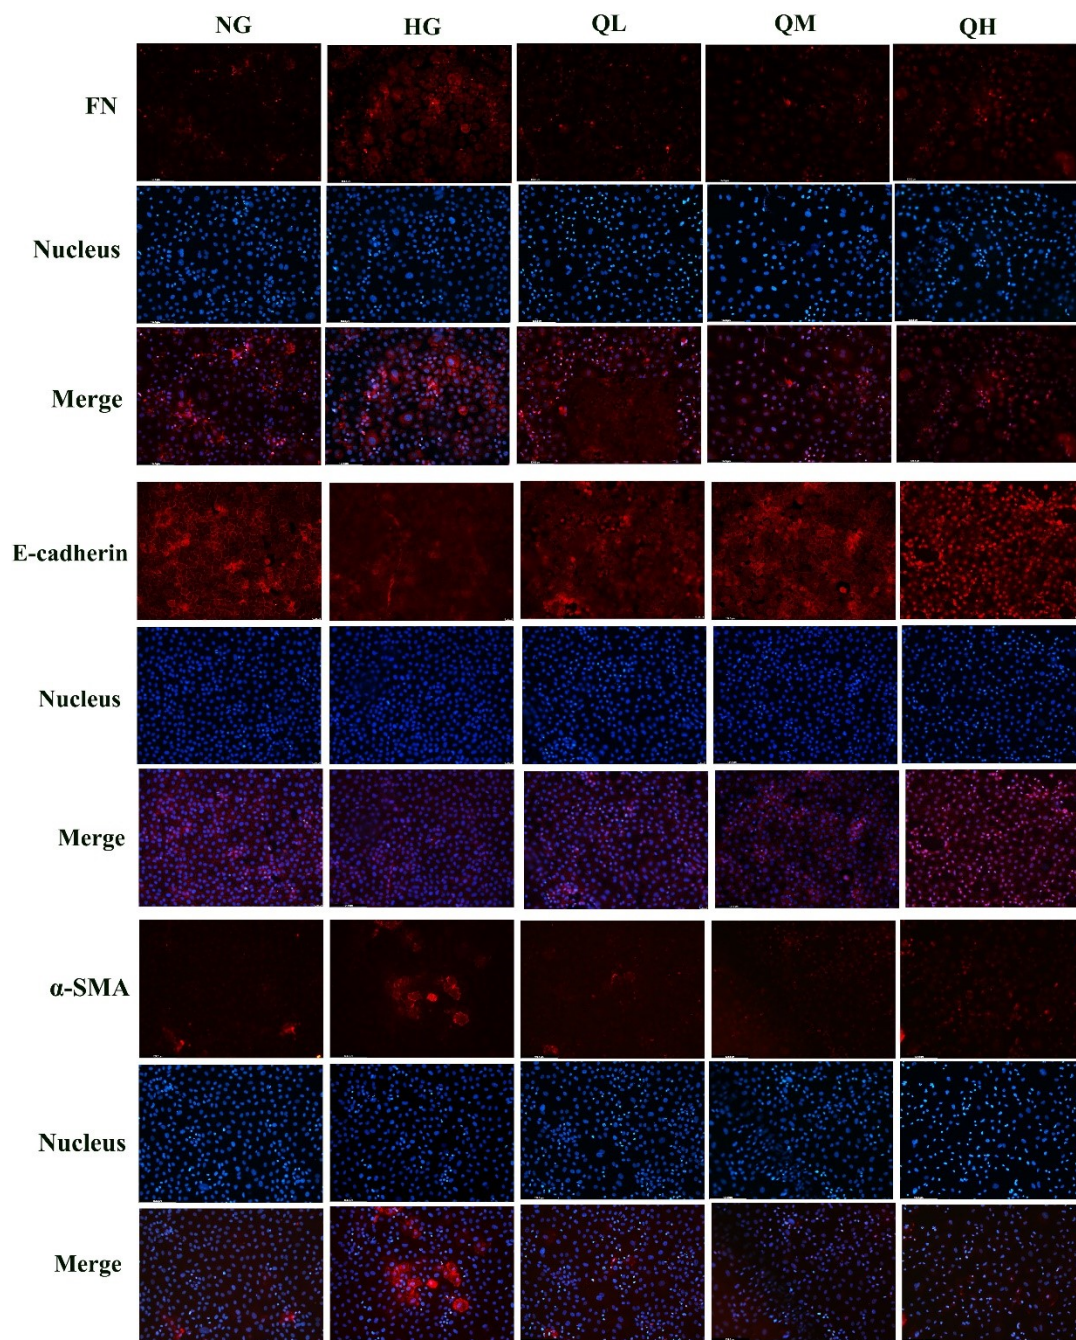

S1

**Supplement Fig.1. Quercetin reversed the process of EMT and TIF in NRK-52E cells**

The IF assay was performed to evaluate the protein levels of epithelial markers (ZO-1 and E-cadherin), mesenchymal markers ( $\alpha$ -SMA and Vimentin), and ECM components (FN and Collagen IV) ( $200\times$  magnification). Independent experiments were performed at least thrice with similar results.

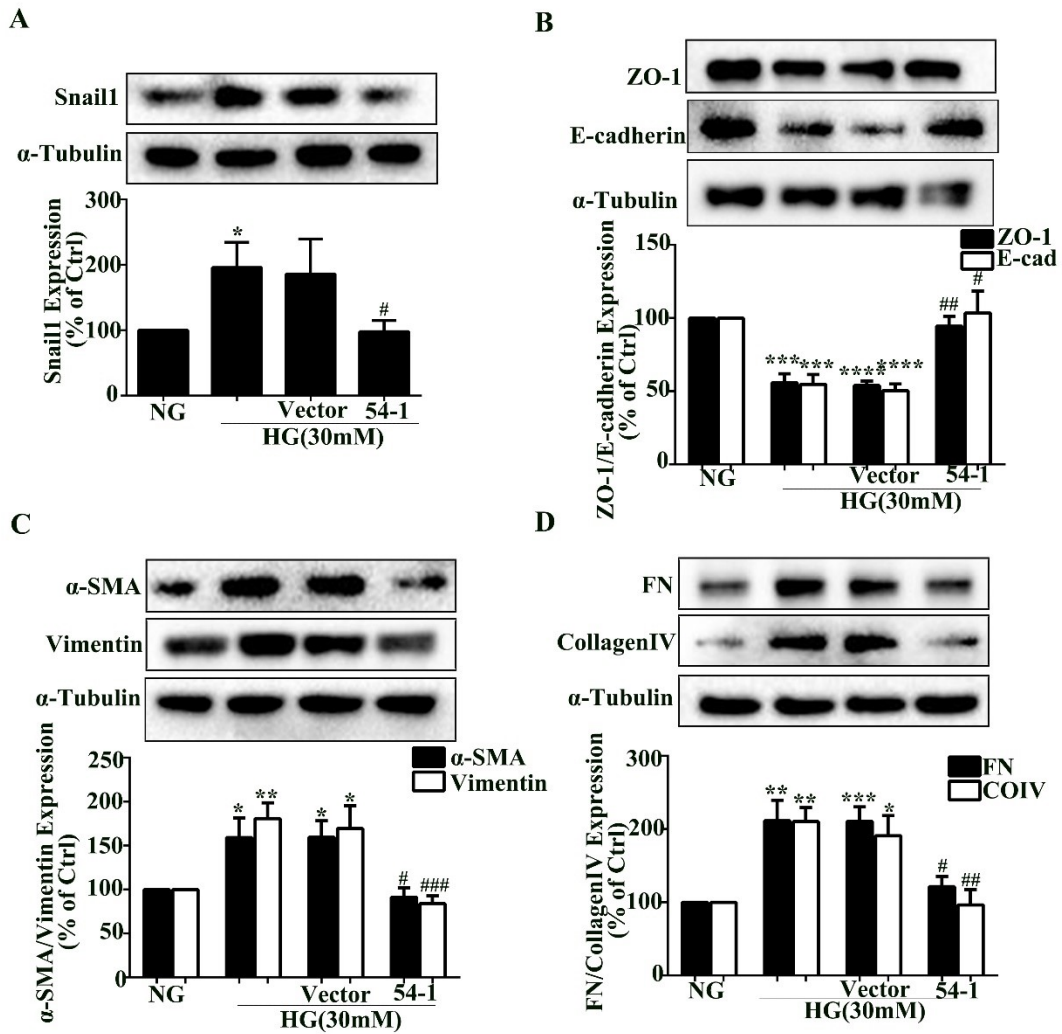

S2

**Supplement Fig.2. Quercetin reversed the process of EMT and ECM-related proteins in NRK-52E cells induced by Snail1 overexpression**

(A) Snail1 interference plasmid was transfected into NRK-52E cells. After 12 h, the cells were stimulated with or without HG for 36 h. The protein expression of Snail1 was determined by Western blot assay. (B) – (D) The protein expressions of ZO-1, E-cadherin,  $\alpha$ -SMA, Vimentin, FN, and Collagen IV were determined after corresponding treatments. \*,  $P < 0.05$  vs. NG, \*\*,  $P < 0.01$  vs. NG, \*\*\*,  $P < 0.001$  vs. NG; #,  $P < 0.05$  vs. HG, ##,  $P < 0.01$  vs. HG, ###,  $P < 0.001$  vs. HG. Independent experiments were performed at least thrice with similar results.

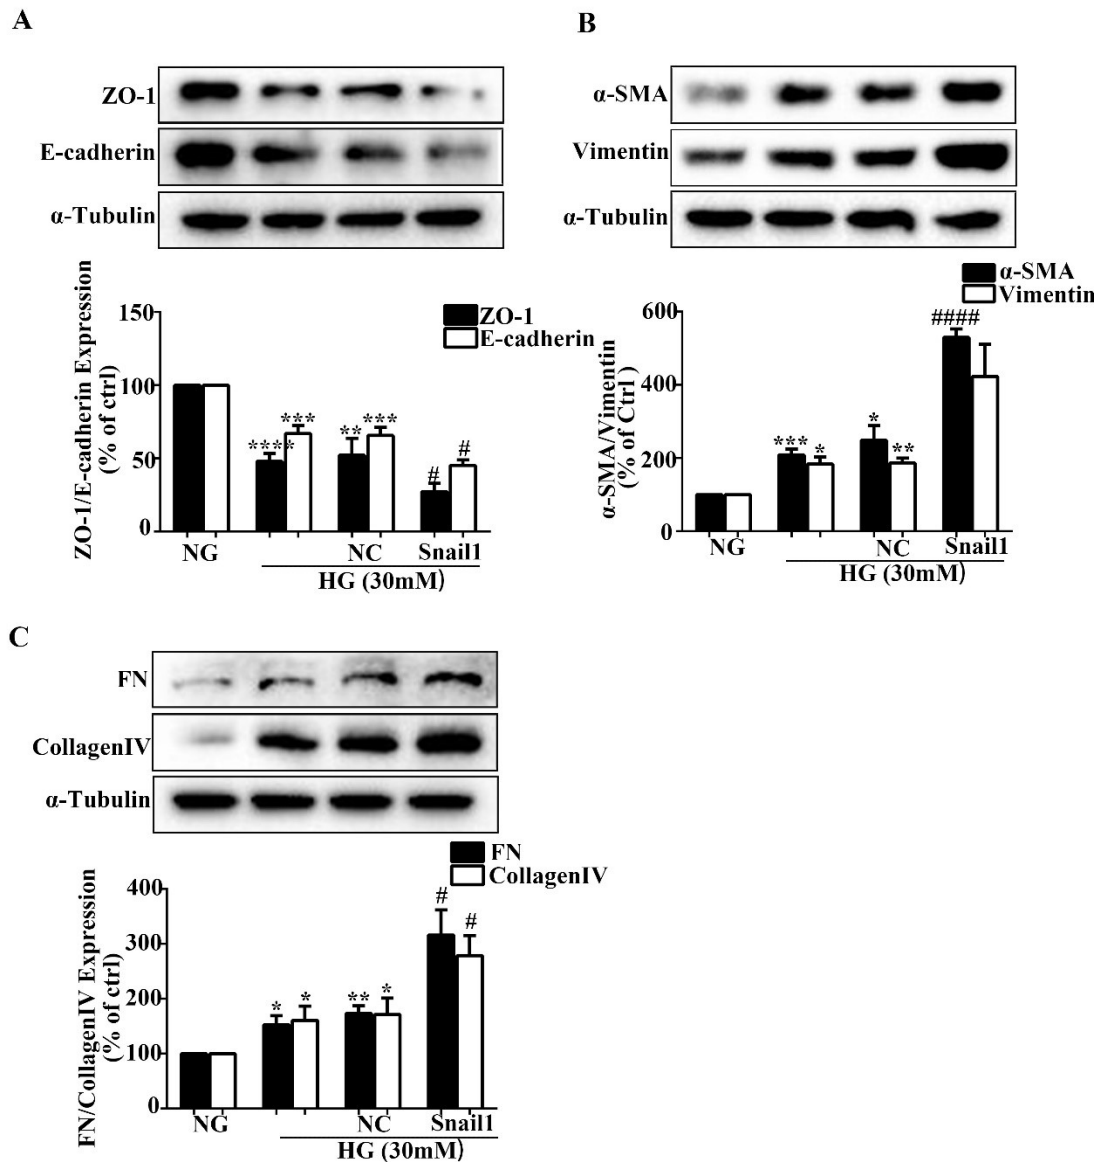

S3

**Supplement Fig.3. Quercetin reversed the process of EMT and ECM-related proteins in NRK-52E cells induced by Snail1 overexpression**

(A) – (C) The Snail1 overexpression plasmid was transfected into NRK-52E cells. After 12 h, the cells were stimulated with or without HG for 36 h. The protein expressions of ZO-1, E-cadherin,  $\alpha$ -SMA, Vimentin, FN, and Collagen IV were determined after the corresponding treatment. \*,  $P < 0.05$  vs. NG, \*\*\*,  $P < 0.001$  vs. NG, \*\*\*\*,  $P < 0.0001$  vs. NG; #,  $P < 0.05$  vs. HG, ####,  $P < 0.0001$  vs. HG. Independent experiments were performed at least thrice with similar results.

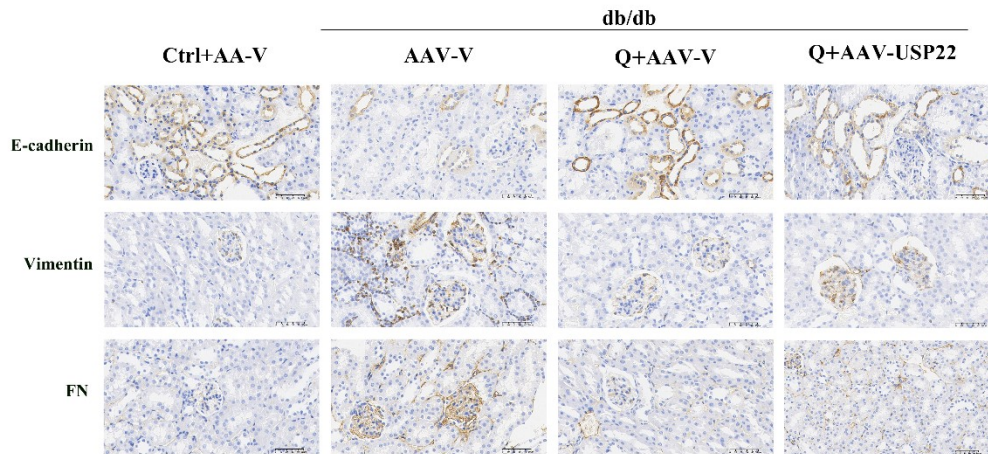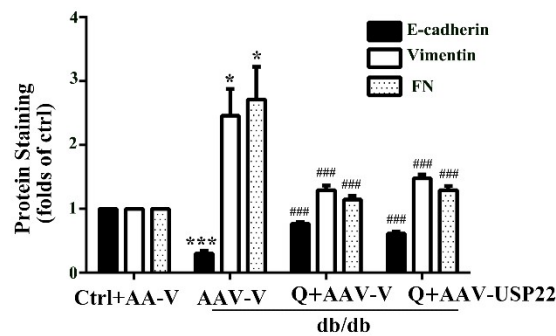

S4

**Supplement Fig.4. Quercetin reversed the process of EMT and TIF induced by overexpression of USP22 in the kidney tissue of db/db mice**

Expressions of epithelial markers (ZO-1 and E-cadherin), mesenchymal markers ( $\alpha$ -SMA and Vimentin), and ECM components (FN and Collagen IV) in the kidney tissues were determined through IHC assay (400  $\times$  magnification). \*,  $P < 0.05$  vs. Ctrl + AAV, \*\*,  $P < 0.01$  vs. Ctrl + AAV, \*\*\*,  $P < 0.001$  vs. Ctrl + AAV, \*\*\*\*,  $P < 0.0001$  vs. Ctrl + AAV; #,  $P < 0.05$  vs. db/db + AAV, ##,  $P < 0.01$  vs. db/db + AAV, ###,  $P < 0.001$  vs. db/db + AAV. Independent experiments were performed at least thrice with similar results.
